# Supplementary material
Source: publisher site journal article supplement (https://www.spandidos-publications.com/1164/downloadSupplementary)
Supplement: Supplementary file 1 [file downloadSupplementary]

## Sheet: Sheet1
Table SV. List of subtype differences.
Gene	lfc	P.value	subtype
ENSG00000006128	-1.27929	0.014433	C2
ENSG00000006283	1.60185	3.41x10-13	C2
ENSG00000006468	1.42097	5.70x10-14	C2
ENSG00000006788	1.06245	0.005665	C2
ENSG00000007216	-2.52623	3.35x10-06	C2
ENSG00000007237	1.13752	3.06x10-14	C2
ENSG00000007306	-1.61377	0.01056	C2
ENSG00000007350	-1.54892	0.010982	C2
ENSG00000007908	1.63638	1.17x10-09	C2
ENSG00000009709	-1.21134	0.046804	C2
ENSG00000009765	-1.12871	0.001664	C2
ENSG00000010282	-1.50193	0.000111	C2
ENSG00000019549	1.38315	5.34x10-11	C2
ENSG00000024422	1.34281	7.31x10-19	C2
ENSG00000027644	1.31235	1.94x10-05	C2
ENSG00000031081	1.28579	1.74x10-19	C2
ENSG00000034239	-1.57778	7.56x10-06	C2
ENSG00000038295	1.82164	1.71x10-16	C2
ENSG00000044524	1.17534	2.45x10-07	C2
ENSG00000049540	1.43868	3.23x10-09	C2
ENSG00000054803	2.22799	3.98x10-18	C2
ENSG00000056291	-2.15386	1.81x10-06	C2
ENSG00000059804	1.33347	2.18x10-11	C2
ENSG00000060303	-1.00027	1.07x10-05	C2
ENSG00000064300	1.26899	6.87x10-05	C2
ENSG00000066382	-1.02775	1.72x10-05	C2
ENSG00000069869	1.05857	1.57x10-12	C2
ENSG00000070031	1.18077	1.21x10-07	C2
ENSG00000070193	2.57447	5.93x10-12	C2
ENSG00000070808	1.59895	1.15x10-11	C2
ENSG00000072952	1.7577	2.94x10-26	C2
ENSG00000073282	1.37071	2.22x10-07	C2
ENSG00000074590	1.65884	1.48x10-22	C2
ENSG00000077157	1.31214	2.49x10-21	C2
ENSG00000077264	1.45247	4.20x10-06	C2
ENSG00000078725	1.48797	1.34x10-05	C2
ENSG00000079102	1.47765	4.31x10-08	C2
ENSG00000080572	-2.79171	4.13x10-10	C2
ENSG00000080573	1.38374	2.15x10-08	C2
ENSG00000083622	-1.69863	0.004499	C2
ENSG00000084636	1.80611	2.99x10-27	C2
ENSG00000086506	-1.33054	0.000565	C2
ENSG00000086548	-1.26024	0.000355	C2
ENSG00000090534	1.14251	5.52x10-08	C2
ENSG00000091136	1.38265	2.70x10-19	C2
ENSG00000091656	1.83842	7.73x10-18	C2
ENSG00000095932	-1.00449	0.003856	C2
ENSG00000100234	2.42032	2.39x10-29	C2
ENSG00000100285	-1.18646	0.001375	C2
ENSG00000100427	-1.21515	0.001307	C2
ENSG00000100739	1.2931	8.22x10-07	C2
ENSG00000100867	-1.57935	7.53x10-07	C2
ENSG00000100884	1.0921	0.004939	C2
ENSG00000101230	1.92379	3.16x10-18	C2
ENSG00000101443	-1.28483	4.78x10-11	C2
ENSG00000101825	1.43846	1.37x10-13	C2
ENSG00000102076	-2.12146	2.57x10-07	C2
ENSG00000102271	1.21508	1.09x10-07	C2
ENSG00000102359	1.20686	1.24x10-11	C2
ENSG00000102385	1.28683	2.18x10-12	C2
ENSG00000102452	1.19909	3.41x10-08	C2
ENSG00000102837	-1.07809	0.045279	C2
ENSG00000103196	2.33141	3.95x10-30	C2
ENSG00000103241	1.63436	2.82x10-19	C2
ENSG00000103449	-1.02825	0.007059	C2
ENSG00000103460	-1.36869	0.004138	C2
ENSG00000104415	1.63913	1.63x10-15	C2
ENSG00000104938	-1.10621	0.00919	C2
ENSG00000105419	1.68365	4.38x10-18	C2
ENSG00000105427	-1.07758	1.35x10-06	C2
ENSG00000105492	1.71475	1.35x10-05	C2
ENSG00000105509	2.51554	8.68x10-13	C2
ENSG00000105610	-1.00813	8.71x10-09	C2
ENSG00000105664	2.47027	5.18x10-18	C2
ENSG00000105889	-1.02003	0.00018	C2
ENSG00000105974	1.0161	4.23x10-09	C2
ENSG00000106113	-1.08246	0.000599	C2
ENSG00000106278	1.07736	0.001628	C2
ENSG00000106366	2.17415	4.93x10-17	C2
ENSG00000106541	-1.58081	1.11x10-05	C2
ENSG00000106624	2.08689	1.01x10-26	C2
ENSG00000106631	1.49868	0.000719	C2
ENSG00000106809	1.56747	2.51x10-07	C2
ENSG00000106819	2.54813	2.42x10-21	C2
ENSG00000106927	-1.51246	4.50x10-08	C2
ENSG00000107105	1.71214	1.48x10-09	C2
ENSG00000107562	1.95662	4.36x10-22	C2
ENSG00000107736	1.04296	1.11x10-05	C2
ENSG00000107957	1.39488	7.31x10-24	C2
ENSG00000107984	1.06927	0.007729	C2
ENSG00000108381	1.81239	4.93x10-12	C2
ENSG00000108684	1.6284	1.08x10-05	C2
ENSG00000108797	1.05217	7.52x10-17	C2
ENSG00000108823	1.94584	1.72x10-14	C2
ENSG00000108830	-1.08911	7.22x10-06	C2
ENSG00000109047	1.03158	2.66x10-05	C2
ENSG00000109061	1.4068	0.000392	C2
ENSG00000109832	-1.12271	0.000382	C2
ENSG00000110195	-1.03531	2.22x10-05	C2
ENSG00000110900	1.52019	5.03x10-10	C2
ENSG00000111052	1.0452	1.27x10-07	C2
ENSG00000111834	-1.02914	0.000355	C2
ENSG00000112182	1.08292	2.63x10-08	C2
ENSG00000112559	1.33932	1.09x10-08	C2
ENSG00000112769	1.2794	1.57x10-20	C2
ENSG00000112964	1.19194	2.42x10-07	C2
ENSG00000113196	1.03203	0.006562	C2
ENSG00000113319	1.44654	4.14x10-19	C2
ENSG00000113749	1.18462	4.47x10-10	C2
ENSG00000114200	1.53098	3.80x10-06	C2
ENSG00000114248	-1.64434	0.000142	C2
ENSG00000115386	-1.96281	8.28x10-05	C2
ENSG00000116031	1.07784	0.000536	C2
ENSG00000116132	2.08174	4.09x10-16	C2
ENSG00000116147	1.06479	0.000168	C2
ENSG00000116741	1.20847	2.28x10-09	C2
ENSG00000116774	1.13151	9.89x10-12	C2
ENSG00000116962	1.38358	4.01x10-18	C2
ENSG00000117020	1.1389	9.22x10-07	C2
ENSG00000118094	1.23161	7.17x10-06	C2
ENSG00000118231	-1.79279	0.029904	C2
ENSG00000118492	-1.54664	0.000277	C2
ENSG00000119508	2.29231	6.31x10-15	C2
ENSG00000119865	1.17636	3.52x10-14	C2
ENSG00000120129	1.10797	2.54x10-07	C2
ENSG00000120949	1.19943	4.37x10-07	C2
ENSG00000122121	2.48583	2.11x10-18	C2
ENSG00000122420	2.17912	9.65x10-12	C2
ENSG00000122641	2.02404	9.60x10-14	C2
ENSG00000122786	1.26987	4.12x10-24	C2
ENSG00000122861	1.38767	1.12x10-10	C2
ENSG00000122877	1.51854	3.12x10-11	C2
ENSG00000123342	1.37087	2.92x10-15	C2
ENSG00000123358	1.57533	4.49x10-10	C2
ENSG00000123388	-1.72061	0.000524	C2
ENSG00000123560	1.00103	0.005179	C2
ENSG00000124749	1.0658	3.16x10-05	C2
ENSG00000125851	1.07324	0.01816	C2
ENSG00000125872	1.15962	1.55x10-05	C2
ENSG00000125995	-1.07818	9.70x10-14	C2
ENSG00000126262	1.08321	1.90x10-05	C2
ENSG00000126562	1.57787	9.16x10-10	C2
ENSG00000127083	2.13195	1.30x10-09	C2
ENSG00000127472	1.07833	1.61x10-06	C2
ENSG00000127528	1.62427	2.61x10-19	C2
ENSG00000128285	1.09543	1.39x10-05	C2
ENSG00000130176	1.78961	1.03x10-14	C2
ENSG00000130635	2.28853	5.51x10-24	C2
ENSG00000132031	1.40004	1.73x10-12	C2
ENSG00000132386	1.59781	1.60x10-16	C2
ENSG00000132437	-1.35863	6.67x10-06	C2
ENSG00000132677	-1.35405	9.13x10-07	C2
ENSG00000132854	1.42584	4.08x10-07	C2
ENSG00000132872	1.48717	0.004587	C2
ENSG00000133816	1.01084	2.72x10-10	C2
ENSG00000133863	-1.17643	0.000504	C2
ENSG00000134160	-1.17735	0.001512	C2
ENSG00000134240	-3.45398	5.25x10-14	C2
ENSG00000134438	-1.42115	0.002281	C2
ENSG00000135222	2.233	0.008832	C2
ENSG00000135312	1.3814	2.84x10-06	C2
ENSG00000136011	1.81974	2.85x10-14	C2
ENSG00000137133	-1.04567	9.86x10-15	C2
ENSG00000137288	-1.00436	1.83x10-12	C2
ENSG00000137473	-1.97877	1.52x10-06	C2
ENSG00000137809	2.20921	2.65x10-22	C2
ENSG00000137960	-1.2223	9.64x10-05	C2
ENSG00000138347	-1.10205	0.000422	C2
ENSG00000138615	2.01898	1.04x10-16	C2
ENSG00000139174	1.024	4.53x10-08	C2
ENSG00000139549	1.3229	1.08x10-09	C2
ENSG00000140682	1.20486	6.50x10-20	C2
ENSG00000140807	1.31111	3.37x10-15	C2
ENSG00000140835	-1.26763	3.82x10-05	C2
ENSG00000142178	1.19338	0.000116	C2
ENSG00000142303	1.5969	1.70x10-24	C2
ENSG00000142405	1.30194	9.11x10-15	C2
ENSG00000142530	-1.1332	6.80x10-08	C2
ENSG00000142549	1.17845	0.00121	C2
ENSG00000142623	1.22696	0.006089	C2
ENSG00000142700	-1.00391	0.012457	C2
ENSG00000142789	-3.02621	0.000114	C2
ENSG00000143171	-1.37823	0.000982	C2
ENSG00000143196	1.63519	1.97x10-07	C2
ENSG00000143867	1.24082	1.71x10-06	C2
ENSG00000144218	1.09348	2.80x10-05	C2
ENSG00000144810	2.27493	3.34x10-24	C2
ENSG00000144891	1.91327	4.88x10-12	C2
ENSG00000145192	-1.18639	0.000327	C2
ENSG00000145506	1.14543	2.37x10-06	C2
ENSG00000145536	2.10848	6.08x10-12	C2
ENSG00000146070	1.01781	2.17x10-08	C2
ENSG00000147223	-1.48225	0.000241	C2
ENSG00000147256	-1.21641	0.004379	C2
ENSG00000147465	-2.05126	4.49x10-07	C2
ENSG00000147889	-1.05117	2.72x10-05	C2
ENSG00000148053	1.12349	1.16x10-05	C2
ENSG00000148346	-1.54984	3.29x10-08	C2
ENSG00000148516	1.46762	2.79x10-23	C2
ENSG00000148798	-1.41397	7.22x10-05	C2
ENSG00000148965	-1.32748	0.001141	C2
ENSG00000149534	2.31062	4.49x10-15	C2
ENSG00000149596	1.75686	7.07x10-18	C2
ENSG00000150630	1.11692	1.22x10-13	C2
ENSG00000150750	-1.49636	0.001343	C2
ENSG00000151023	-1.20423	7.47x10-05	C2
ENSG00000151067	1.78604	8.46x10-25	C2
ENSG00000151360	-1.42753	0.005243	C2
ENSG00000151617	1.53523	5.78x10-16	C2
ENSG00000151892	2.188	4.41x10-15	C2
ENSG00000152049	1.84809	3.01x10-17	C2
ENSG00000152669	-1.12225	2.51x10-06	C2
ENSG00000152936	-1.34962	0.002896	C2
ENSG00000153071	1.04479	4.00x10-16	C2
ENSG00000153132	-1.11118	1.94x10-05	C2
ENSG00000153253	1.07745	0.00043	C2
ENSG00000153347	-1.18825	0.001433	C2
ENSG00000153707	1.24546	2.21x10-06	C2
ENSG00000153789	-1.41842	0.000281	C2
ENSG00000154188	1.27475	2.96x10-09	C2
ENSG00000154678	1.99354	5.81x10-18	C2
ENSG00000155511	1.01063	0.007099	C2
ENSG00000156269	-3.23135	2.04x10-05	C2
ENSG00000156885	-1.10639	0.001529	C2
ENSG00000157240	1.24633	1.07x10-19	C2
ENSG00000157613	1.30469	2.29x10-11	C2
ENSG00000157766	1.56667	6.70x10-11	C2
ENSG00000157856	-1.19247	0.000192	C2
ENSG00000158164	-1.52201	1.80x10-05	C2
ENSG00000158352	1.01749	2.24x10-10	C2
ENSG00000158423	-1.07838	8.88x10-09	C2
ENSG00000158859	1.52381	2.66x10-17	C2
ENSG00000159398	-1.06173	0.020576	C2
ENSG00000159409	-1.25181	0.001306	C2
ENSG00000159650	-1.00017	0.000933	C2
ENSG00000159674	1.15793	4.89x10-12	C2
ENSG00000160013	1.21219	4.47x10-14	C2
ENSG00000160161	1.86401	3.10x10-25	C2
ENSG00000160180	-2.49397	2.18x10-10	C2
ENSG00000160182	-1.2484	0.006132	C2
ENSG00000160221	-1.52969	1.50x10-06	C2
ENSG00000160345	-1.04517	1.00x10-09	C2
ENSG00000160472	-1.12452	0.0007	C2
ENSG00000160862	-1.09278	0.002835	C2
ENSG00000161381	1.13452	1.95x10-11	C2
ENSG00000161509	-1.1234	9.74x10-05	C2
ENSG00000161940	1.03938	4.07x10-13	C2
ENSG00000162460	-1.89048	1.47x10-05	C2
ENSG00000162598	-2.07561	1.53x10-07	C2
ENSG00000162630	1.52996	7.55x10-10	C2
ENSG00000162849	2.15998	1.69x10-23	C2
ENSG00000163060	-1.41158	2.15x10-05	C2
ENSG00000163075	-1.64356	2.56x10-10	C2
ENSG00000163145	1.66109	7.19x10-16	C2
ENSG00000163209	-2.22135	0.011144	C2
ENSG00000163288	-1.66494	0.001986	C2
ENSG00000163297	1.42056	1.03x10-19	C2
ENSG00000163331	-1.80596	8.55x10-09	C2
ENSG00000163395	1.44961	0.000296	C2
ENSG00000163497	1.23087	0.00044	C2
ENSG00000163534	1.70689	0.000117	C2
ENSG00000163736	1.39397	0.000106	C2
ENSG00000163885	-1.47975	4.02x10-06	C2
ENSG00000164129	1.89099	0.000873	C2
ENSG00000164188	1.90385	6.54x10-13	C2
ENSG00000164292	1.00312	5.44x10-08	C2
ENSG00000164326	-4.11044	4.62x10-10	C2
ENSG00000164692	1.78361	1.60x10-20	C2
ENSG00000164746	-1.61031	1.72x10-08	C2
ENSG00000164972	-1.84096	4.58x10-08	C2
ENSG00000165124	2.18005	5.61x10-20	C2
ENSG00000165269	1.4003	7.08x10-06	C2
ENSG00000165300	1.28276	0.000206	C2
ENSG00000165379	1.46374	7.26x10-07	C2
ENSG00000165383	-1.3914	0.000987	C2
ENSG00000165424	1.55011	2.26x10-29	C2
ENSG00000165757	1.29308	1.25x10-14	C2
ENSG00000165949	-1.07218	6.65x10-06	C2
ENSG00000166341	1.72713	1.15x10-25	C2
ENSG00000166426	-1.12398	0.00561	C2
ENSG00000166546	1.32198	8.54x10-14	C2
ENSG00000166558	-1.84718	0.000106	C2
ENSG00000166596	-1.25816	2.88x10-07	C2
ENSG00000166670	-1.1348	0.005509	C2
ENSG00000166819	2.01658	1.47x10-08	C2
ENSG00000166823	-1.3248	2.67x10-09	C2
ENSG00000166897	1.45205	7.93x10-06	C2
ENSG00000166963	1.12417	3.41x10-13	C2
ENSG00000167858	-2.19299	1.27x10-08	C2
ENSG00000168461	1.0991	1.77x10-15	C2
ENSG00000168546	1.66895	4.27x10-07	C2
ENSG00000168658	-1.24258	2.68x10-06	C2
ENSG00000168779	1.25409	7.37x10-05	C2
ENSG00000169184	1.61098	1.75x10-15	C2
ENSG00000169297	-1.79593	2.51x10-05	C2
ENSG00000169604	1.68407	2.94x10-26	C2
ENSG00000169744	1.13295	2.66x10-17	C2
ENSG00000170044	2.19308	3.97x10-11	C2
ENSG00000170099	-1.89452	1.90x10-05	C2
ENSG00000170262	1.53434	2.94x10-07	C2
ENSG00000170324	-1.07753	0.012854	C2
ENSG00000170426	-1.20848	0.000736	C2
ENSG00000170516	-3.92653	1.99x10-05	C2
ENSG00000170608	-1.30427	0.000595	C2
ENSG00000170627	-2.0007	2.48x10-06	C2
ENSG00000170703	-1.01694	0.004938	C2
ENSG00000170835	-1.18418	7.55x10-06	C2
ENSG00000170961	1.34648	3.29x10-08	C2
ENSG00000170962	1.47453	2.75x10-17	C2
ENSG00000170965	-1.92313	1.26x10-07	C2
ENSG00000171711	-1.40081	0.005291	C2
ENSG00000171855	-1.42642	7.43x10-05	C2
ENSG00000171864	1.07132	0.000565	C2
ENSG00000172179	1.26689	0.008679	C2
ENSG00000172349	1.0184	3.98x10-11	C2
ENSG00000172771	-1.08669	4.53x10-06	C2
ENSG00000172935	1.10624	6.78x10-11	C2
ENSG00000173212	-1.17557	0.009279	C2
ENSG00000173267	-1.02186	0.000833	C2
ENSG00000173546	1.10257	1.96x10-11	C2
ENSG00000174145	2.0345	7.32x10-07	C2
ENSG00000174576	1.13992	0.002055	C2
ENSG00000174697	1.99564	6.37x10-11	C2
ENSG00000174807	1.46344	1.07x10-16	C2
ENSG00000174876	-1.89232	2.67x10-06	C2
ENSG00000174898	-1.51413	4.70x10-06	C2
ENSG00000174950	-1.30666	1.66x10-07	C2
ENSG00000175065	1.30131	0.004089	C2
ENSG00000175701	-1.0181	4.45x10-09	C2
ENSG00000175745	1.27804	4.26x10-11	C2
ENSG00000176029	-1.86779	3.95x10-08	C2
ENSG00000176153	-1.0842	8.99x10-05	C2
ENSG00000176381	-1.24277	0.000804	C2
ENSG00000176692	1.67867	6.59x10-11	C2
ENSG00000176746	-3.63702	9.76x10-07	C2
ENSG00000178033	1.01428	2.54x10-07	C2
ENSG00000178125	-1.23378	7.78x10-06	C2
ENSG00000178404	1.36175	3.19x10-11	C2
ENSG00000179388	1.64847	8.49x10-10	C2
ENSG00000179799	-1.08886	8.67x10-05	C2
ENSG00000179902	-2.50041	8.23x10-14	C2
ENSG00000179915	1.2365	0.00025	C2
ENSG00000180139	2.23554	1.38x10-26	C2
ENSG00000180318	-1.13621	0.025947	C2
ENSG00000180447	1.07149	4.59x10-09	C2
ENSG00000180739	1.00503	1.12x10-07	C2
ENSG00000180785	1.041	3.32x10-09	C2
ENSG00000181104	1.13455	1.54x10-13	C2
ENSG00000181541	2.56352	8.41x10-12	C2
ENSG00000181800	1.44686	2.16x10-06	C2
ENSG00000182752	1.52383	1.89x10-09	C2
ENSG00000182898	1.87143	0.021456	C2
ENSG00000183273	-2.41768	1.83x10-08	C2
ENSG00000183690	-1.15218	1.53x10-08	C2
ENSG00000183844	-1.00079	0.000216	C2
ENSG00000184809	-1.81222	5.29x10-07	C2
ENSG00000184845	1.37803	0.001151	C2
ENSG00000185681	-2.1682	1.47x10-09	C2
ENSG00000185860	-2.18933	1.57x10-06	C2
ENSG00000186010	-1.07626	2.29x10-11	C2
ENSG00000186198	-1.03852	0.000223	C2
ENSG00000186340	2.26444	4.12x10-22	C2
ENSG00000186407	1.03506	4.53x10-06	C2
ENSG00000186466	1.11905	0.002394	C2
ENSG00000186471	-1.12351	0.002848	C2
ENSG00000186642	1.12028	1.67x10-13	C2
ENSG00000186714	-1.00452	3.63x10-08	C2
ENSG00000187048	-1.85068	3.63x10-06	C2
ENSG00000187288	1.91249	9.57x10-07	C2
ENSG00000187479	1.35125	3.76x10-09	C2
ENSG00000187492	-2.02956	1.34x10-08	C2
ENSG00000187498	1.0902	1.31x10-16	C2
ENSG00000187510	-1.12882	0.000548	C2
ENSG00000187616	1.73986	5.47x10-07	C2
ENSG00000187783	-1.17839	0.00596	C2
ENSG00000188257	2.06729	5.09x10-08	C2
ENSG00000188505	1.08137	0.000812	C2
ENSG00000189129	1.09344	5.51x10-09	C2
ENSG00000189186	-2.73776	1.73x10-06	C2
ENSG00000189292	-1.15318	0.000935	C2
ENSG00000189377	-1.11326	0.003715	C2
ENSG00000196090	1.91641	1.27x10-05	C2
ENSG00000196289	-1.12589	0.001512	C2
ENSG00000196562	1.2436	7.41x10-11	C2
ENSG00000196616	2.79564	5.89x10-11	C2
ENSG00000196754	-1.36587	2.63x10-06	C2
ENSG00000197253	1.77588	5.81x10-08	C2
ENSG00000197320	1.49333	1.81x10-05	C2
ENSG00000197408	-1.38712	0.024532	C2
ENSG00000197616	-1.25225	0.004585	C2
ENSG00000197721	-1.43719	2.40x10-07	C2
ENSG00000197745	-2.54371	1.01x10-06	C2
ENSG00000197766	1.10398	3.29x10-07	C2
ENSG00000197826	-1.2013	0.00336	C2
ENSG00000197889	-1.26284	2.97x10-10	C2
ENSG00000198010	1.58225	8.33x10-11	C2
ENSG00000198099	1.10936	0.004091	C2
ENSG00000198258	-1.01338	8.91x10-11	C2
ENSG00000198523	2.61133	2.86x10-20	C2
ENSG00000198681	-3.40604	1.20x10-07	C2
ENSG00000198739	-1.51715	0.002842	C2
ENSG00000198753	1.19219	3.04x10-05	C2
ENSG00000198795	1.49599	6.96x10-10	C2
ENSG00000198796	1.9358	1.24x10-11	C2
ENSG00000199377	-1.37015	9.57x10-07	C2
ENSG00000203585	1.17167	2.22x10-08	C2
ENSG00000203710	1.13394	4.07x10-07	C2
ENSG00000203740	1.25215	0.000688	C2
ENSG00000204131	1.0187	2.25x10-08	C2
ENSG00000204583	-1.00489	0.012669	C2
ENSG00000204790	-1.97241	4.61x10-05	C2
ENSG00000204983	-1.05088	0.000399	C2
ENSG00000205106	-1.04431	0.00018	C2
ENSG00000205143	-1.1802	8.57x10-05	C2
ENSG00000205414	1.88225	7.70x10-12	C2
ENSG00000205559	-1.0058	5.74x10-11	C2
ENSG00000205632	1.25853	0.034161	C2
ENSG00000205898	1.12995	1.12x10-05	C2
ENSG00000206052	1.36752	8.24x10-14	C2
ENSG00000206538	1.83324	1.60x10-14	C2
ENSG00000207611	1.38442	8.94x10-05	C2
ENSG00000207808	1.58398	1.18x10-06	C2
ENSG00000207980	1.6997	4.00x10-09	C2
ENSG00000210144	-1.42813	3.12x10-11	C2
ENSG00000211625	1.53933	0.001761	C2
ENSG00000211942	1.17956	0.01915	C2
ENSG00000211950	1.45471	0.003146	C2
ENSG00000212385	-1.02697	1.96x10-06	C2
ENSG00000214128	-1.22157	0.000581	C2
ENSG00000214381	-1.82865	0.000144	C2
ENSG00000214650	1.09481	2.44x10-06	C2
ENSG00000214754	-1.8407	0.000913	C2
ENSG00000215148	-1.40811	0.003305	C2
ENSG00000215187	-2.05962	9.54x10-12	C2
ENSG00000215246	1.32568	2.20x10-10	C2
ENSG00000220130	-1.2333	1.51x10-06	C2
ENSG00000221818	1.99931	1.09x10-15	C2
ENSG00000221972	1.38959	4.10x10-09	C2
ENSG00000221986	-1.04348	0.012796	C2
ENSG00000222009	1.01208	2.79x10-09	C2
ENSG00000222022	1.70746	3.29x10-08	C2
ENSG00000222032	1.86209	9.30x10-10	C2
ENSG00000223714	-1.17212	8.15x10-09	C2
ENSG00000223786	-1.27614	0.004622	C2
ENSG00000224116	1.47066	3.12x10-11	C2
ENSG00000224238	1.13926	5.94x10-08	C2
ENSG00000224292	-1.27891	2.18x10-13	C2
ENSG00000224506	-1.40485	0.001036	C2
ENSG00000225255	-2.57278	4.34x10-08	C2
ENSG00000225398	1.42719	1.47x10-06	C2
ENSG00000225706	1.14181	0.000185	C2
ENSG00000225746	1.35396	3.06x10-06	C2
ENSG00000225826	1.47673	4.23x10-05	C2
ENSG00000225948	-1.57955	6.93x10-05	C2
ENSG00000226131	-1.03007	1.59x10-07	C2
ENSG00000226853	-1.20549	2.20x10-13	C2
ENSG00000226956	-2.30487	3.50x10-07	C2
ENSG00000227220	1.28134	6.04x10-11	C2
ENSG00000227467	1.06062	5.93x10-06	C2
ENSG00000227857	-1.31866	7.53x10-07	C2
ENSG00000227932	-1.56502	0.048529	C2
ENSG00000227964	2.20777	1.22x10-11	C2
ENSG00000228153	1.03779	0.000268	C2
ENSG00000228541	-1.05615	0.000639	C2
ENSG00000228549	-1.03408	0.00733	C2
ENSG00000228559	-1.08848	0.010559	C2
ENSG00000229116	1.04162	1.57x10-05	C2
ENSG00000229155	-1.90706	0.003168	C2
ENSG00000229743	2.08988	0.032273	C2
ENSG00000229806	-1.02729	5.02x10-07	C2
ENSG00000230432	-1.02118	0.002842	C2
ENSG00000230630	1.36431	4.22x10-12	C2
ENSG00000230679	-1.13805	4.23x10-08	C2
ENSG00000231123	1.96082	4.61x10-11	C2
ENSG00000231133	1.12087	1.36x10-06	C2
ENSG00000231507	-1.01759	9.76x10-06	C2
ENSG00000231533	-1.44607	5.67x10-06	C2
ENSG00000231621	-2.03295	1.22x10-09	C2
ENSG00000231651	-1.68418	2.18x10-11	C2
ENSG00000231755	-1.18223	0.000686	C2
ENSG00000231971	-1.2296	0.002144	C2
ENSG00000232072	-1.52203	0.004148	C2
ENSG00000232093	-1.12165	7.07x10-11	C2
ENSG00000232111	-1.7135	0.028412	C2
ENSG00000232139	-1.20066	1.46x10-06	C2
ENSG00000232192	1.79123	1.33x10-10	C2
ENSG00000232197	-1.55133	0.009851	C2
ENSG00000232310	-1.0929	0.002125	C2
ENSG00000232362	-1.12918	4.05x10-08	C2
ENSG00000232369	-1.17761	4.22x10-08	C2
ENSG00000232415	-1.0483	8.92x10-05	C2
ENSG00000232621	-1.43393	0.003766	C2
ENSG00000232671	-1.1056	7.45x10-15	C2
ENSG00000232721	-1.46209	6.04x10-06	C2
ENSG00000232903	-1.49036	0.007347	C2
ENSG00000233296	-1.54184	7.47x10-05	C2
ENSG00000233379	-1.37005	0.046815	C2
ENSG00000233461	-1.21241	1.05x10-12	C2
ENSG00000233515	-1.8651	0.021149	C2
ENSG00000233521	1.57708	1.73x10-08	C2
ENSG00000233975	-1.01621	0.000469	C2
ENSG00000234183	-1.44724	1.22x10-09	C2
ENSG00000234327	-1.18656	7.75x10-13	C2
ENSG00000234354	-1.12316	9.49x10-05	C2
ENSG00000234456	1.24635	3.32x10-12	C2
ENSG00000234488	-1.00763	1.13x10-07	C2
ENSG00000234493	-1.09232	0.00851	C2
ENSG00000234602	-1.28519	5.67x10-06	C2
ENSG00000234692	-1.3284	0.009829	C2
ENSG00000234896	-1.00032	0.003636	C2
ENSG00000234965	-1.62282	3.76x10-09	C2
ENSG00000235142	-1.76322	7.42x10-08	C2
ENSG00000235689	-1.1867	0.032343	C2
ENSG00000235770	1.03348	1.27x10-07	C2
ENSG00000235830	-1.56648	4.06x10-09	C2
ENSG00000235865	1.07364	1.39x10-10	C2
ENSG00000235885	1.33749	7.15x10-09	C2
ENSG00000236081	-1.11686	0.002837	C2
ENSG00000236107	-1.06432	0.02578	C2
ENSG00000236253	-1.06345	0.002811	C2
ENSG00000236449	-2.10592	6.00x10-07	C2
ENSG00000236502	-1.94988	0.002043	C2
ENSG00000236581	1.01366	7.15x10-07	C2
ENSG00000236663	-1.0855	0.001238	C2
ENSG00000236708	1.37001	0.000345	C2
ENSG00000236824	-1.07663	0.000657	C2
ENSG00000236846	-1.08925	0.000334	C2
ENSG00000236941	-1.47622	0.009545	C2
ENSG00000237223	-1.22205	0.001752	C2
ENSG00000237429	-1.05741	0.000309	C2
ENSG00000237701	-1.04203	1.74x10-06	C2
ENSG00000237976	-1.08353	9.04x10-09	C2
ENSG00000239256	-1.1319	1.36x10-06	C2
ENSG00000239268	1.03207	0.045448	C2
ENSG00000239405	1.27607	0.000565	C2
ENSG00000239948	1.09715	2.54x10-05	C2
ENSG00000239961	1.23141	4.69x10-05	C2
ENSG00000240922	-1.44341	0.001832	C2
ENSG00000241186	-1.09264	0.000183	C2
ENSG00000241544	-1.08414	4.27x10-05	C2
ENSG00000243955	-1.6902	1.55x10-06	C2
ENSG00000244184	-1.34307	1.73x10-13	C2
ENSG00000244953	1.76856	3.05x10-08	C2
ENSG00000246067	-1.11241	1.98x10-12	C2
ENSG00000246430	1.29767	4.83x10-07	C2
ENSG00000248576	-1.46773	6.70x10-06	C2
ENSG00000248968	-1.01806	2.66x10-07	C2
ENSG00000249082	-1.51721	0.002285	C2
ENSG00000249092	-1.33696	2.80x10-07	C2
ENSG00000249610	-1.23569	0.002701	C2
ENSG00000249669	1.56796	1.60x10-13	C2
ENSG00000250038	-2.74824	0.018983	C2
ENSG00000250280	1.28493	4.98x10-07	C2
ENSG00000250413	-1.85346	7.00x10-11	C2
ENSG00000250742	-1.19193	3.31x10-06	C2
ENSG00000251062	-1.00126	7.55x10-06	C2
ENSG00000251151	-1.35049	0.039443	C2
ENSG00000253123	1.16358	9.51x10-06	C2
ENSG00000253159	1.56614	5.83x10-13	C2
ENSG00000253161	1.03861	9.64x10-05	C2
ENSG00000253364	1.23842	0.003525	C2
ENSG00000253369	-1.39159	0.004145	C2
ENSG00000253400	-1.14506	0.006349	C2
ENSG00000253417	-1.23672	2.32x10-05	C2
ENSG00000253537	1.06227	3.50x10-05	C2
ENSG00000253818	-1.50874	0.005008	C2
ENSG00000253819	-2.02274	4.18x10-05	C2
ENSG00000254404	-2.03046	1.41x10-07	C2
ENSG00000254656	2.0932	2.52x10-08	C2
ENSG00000255038	-1.28369	2.67x10-09	C2
ENSG00000255118	-1.07596	0.000164	C2
ENSG00000255147	-1.04366	0.005317	C2
ENSG00000255399	1.85133	1.28x10-07	C2
ENSG00000255571	-1.0777	0.000698	C2
ENSG00000256103	-1.25779	3.71x10-12	C2
ENSG00000256350	-1.17559	0.029775	C2
ENSG00000256968	-1.12101	1.73x10-08	C2
ENSG00000258279	-1.37968	1.00x10-06	C2
ENSG00000258609	-1.82517	4.73x10-05	C2
ENSG00000258713	-1.03606	0.004676	C2
ENSG00000259420	-1.16284	0.000414	C2
ENSG00000259508	-1.93626	1.22x10-06	C2
ENSG00000259645	1.46796	8.58x10-07	C2
ENSG00000259663	1.46835	6.18x10-05	C2
ENSG00000259925	-1.2102	6.95x10-05	C2
ENSG00000260121	1.10126	2.58x10-10	C2
ENSG00000260265	-1.31308	3.26x10-06	C2
ENSG00000260625	-1.03142	5.42x10-09	C2
ENSG00000260857	-1.36296	0.010078	C2
ENSG00000261039	1.62342	4.91x10-06	C2
ENSG00000261172	1.04019	0.013404	C2
ENSG00000261292	1.05654	0.009845	C2
ENSG00000261295	1.44122	2.42x10-13	C2
ENSG00000261399	-1.82927	2.21x10-10	C2
ENSG00000261706	2.17649	4.74x10-07	C2
ENSG00000261742	1.76051	1.49x10-07	C2
ENSG00000261761	-2.04037	0.026952	C2
ENSG00000261780	-1.24896	0.043539	C2
ENSG00000261886	-1.11525	4.81x10-06	C2
ENSG00000263834	1.63999	9.68x10-08	C2
ENSG00000263931	1.0144	3.46x10-09	C2
ENSG00000266441	-1.23288	1.41x10-06	C2
ENSG00000266709	1.36947	1.85x10-09	C2
ENSG00000266995	1.46991	2.26x10-05	C2
ENSG00000267013	1.24845	0.004089	C2
ENSG00000267073	-1.30906	0.012252	C2
ENSG00000267078	1.05169	5.98x10-05	C2
ENSG00000267136	1.47204	9.78x10-07	C2
ENSG00000267375	1.04917	0.000265	C2
ENSG00000267409	1.64843	2.95x10-09	C2
ENSG00000267449	-1.05454	2.04x10-07	C2
ENSG00000267472	-1.10374	0.007623	C2
ENSG00000267491	1.58441	6.86x10-10	C2
ENSG00000267567	-1.3061	0.00024	C2
ENSG00000267583	1.15083	1.57x10-05	C2
ENSG00000267690	1.19446	0.000207	C2
ENSG00000267795	-1.18793	1.23x10-09	C2
ENSG00000268100	-1.20206	0.013298	C2
ENSG00000268879	1.71657	3.73x10-06	C2
ENSG00000268916	-2.56129	1.90x10-09	C2
ENSG00000268940	-3.05518	5.23x10-06	C2
ENSG00000269096	-1.72624	0.007889	C2
ENSG00000269113	1.14955	2.96x10-05	C2
ENSG00000269119	-1.54449	4.38x10-06	C2
ENSG00000269139	-1.16516	2.23x10-05	C2
ENSG00000269210	-1.29344	0.000107	C2
ENSG00000269364	-1.54561	2.28x10-05	C2
ENSG00000270006	-1.33107	1.63x10-12	C2
ENSG00000270246	1.05151	0.002365	C2
ENSG00000270372	-1.10755	0.039412	C2
ENSG00000270412	1.42785	1.38x10-09	C2
ENSG00000270442	-1.73723	1.79x10-05	C2
ENSG00000270497	1.28563	9.53x10-07	C2
ENSG00000270938	-1.17752	3.58x10-05	C2
ENSG00000271417	1.60123	6.76x10-06	C2
ENSG00000271811	1.7311	2.42x10-09	C2
ENSG00000271937	-1.38565	8.94x10-11	C2
ENSG00000271983	-1.02916	1.75x10-06	C2
ENSG00000272274	-1.47235	8.30x10-05	C2
ENSG00000272524	-1.1148	1.12x10-06	C2
ENSG00000272795	-1.00897	1.57x10-05	C2
ENSG00000272829	-1.12638	1.16x10-07	C2
ENSG00000272931	-1.08765	1.10x10-10	C2
ENSG00000273032	-1.05474	0.000804	C2
ENSG00000273172	-1.08996	0.007795	C2
ENSG00000273313	-1.27768	0.000407	C2
ENSG00000273391	-1.15334	2.29x10-11	C2
ENSG00000273394	-1.14353	9.16x10-08	C2
ENSG00000273805	-1.11279	7.31x10-06	C2
ENSG00000274956	1.62335	0.001145	C2
ENSG00000275216	1.10489	0.015985	C2
ENSG00000275783	1.4313	5.27x10-05	C2
ENSG00000276390	-1.08668	3.19x10-10	C2
ENSG00000276566	2.07182	2.65x10-05	C2
ENSG00000277235	-1.5195	3.88x10-11	C2
ENSG00000277394	-1.00956	9.76x10-07	C2
ENSG00000277597	-1.20663	1.07x10-05	C2
ENSG00000277699	-1.35765	1.60x10-08	C2
ENSG00000277954	1.47646	1.19x10-11	C2
ENSG00000278238	-1.01533	1.24x10-08	C2
ENSG00000278621	1.95517	7.60x10-14	C2
ENSG00000278630	-1.99908	0.023001	C2
ENSG00000278893	1.57072	9.18x10-12	C2
ENSG00000279155	1.07593	2.07x10-05	C2
ENSG00000279160	-1.00295	0.013614	C2
ENSG00000279676	1.22747	0.000468	C2
ENSG00000279965	-1.55932	2.71x10-06	C2
ENSG00000279981	1.41996	7.41x10-07	C2
ENSG00000280055	1.03542	0.000215	C2
ENSG00000280143	1.7399	3.60x10-20	C2
ENSG00000280145	-1.2202	0.012792	C2
ENSG00000280439	-1.45357	0.000282	C2
ENSG00000280604	1.48124	3.03x10-06	C2
ENSG00000280614	1.03053	0.005346	C2
ENSG00000004939	1.04457	6.72x10-06	C3
ENSG00000006468	1.32384	6.54x10-14	C3
ENSG00000006788	1.47784	7.59x10-06	C3
ENSG00000007216	-1.34216	0.013534	C3
ENSG00000007908	1.79235	3.52x10-15	C3
ENSG00000010282	-2.16336	3.16x10-09	C3
ENSG00000019549	1.65479	1.82x10-19	C3
ENSG00000024422	1.18544	3.91x10-19	C3
ENSG00000027644	1.30875	7.13x10-06	C3
ENSG00000031081	1.14351	4.44x10-19	C3
ENSG00000034239	-1.68967	1.71x10-06	C3
ENSG00000038295	1.01729	0.000421	C3
ENSG00000042781	-1.08529	5.80x10-05	C3
ENSG00000044524	1.29282	1.87x10-11	C3
ENSG00000049540	1.4062	7.02x10-11	C3
ENSG00000054803	2.00589	1.49x10-17	C3
ENSG00000056291	-1.70878	5.22x10-05	C3
ENSG00000059804	1.32793	2.29x10-13	C3
ENSG00000064300	1.2422	4.16x10-05	C3
ENSG00000069869	1.01086	3.39x10-13	C3
ENSG00000070031	1.59143	3.93x10-15	C3
ENSG00000070193	2.51993	1.66x10-12	C3
ENSG00000070808	1.53336	6.01x10-10	C3
ENSG00000072952	1.72986	9.54x10-30	C3
ENSG00000074590	1.52734	2.29x10-24	C3
ENSG00000077080	-1.93734	3.60x10-06	C3
ENSG00000078725	1.11287	0.003552	C3
ENSG00000079102	1.78705	6.26x10-14	C3
ENSG00000080572	-3.01507	2.64x10-13	C3
ENSG00000080573	1.33739	7.64x10-09	C3
ENSG00000081148	-1.2583	0.001141	C3
ENSG00000083622	-1.3003	0.017137	C3
ENSG00000084628	-1.12411	8.48x10-05	C3
ENSG00000084636	1.70059	2.06x10-28	C3
ENSG00000085741	1.08807	0.000318	C3
ENSG00000091656	1.32861	7.45x10-08	C3
ENSG00000092345	2.01419	4.04x10-08	C3
ENSG00000094963	1.49138	3.21x10-06	C3
ENSG00000099998	1.1321	2.77x10-14	C3
ENSG00000100234	2.21332	9.11x10-29	C3
ENSG00000100285	-1.07363	0.002528	C3
ENSG00000100739	1.35852	9.82x10-10	C3
ENSG00000101230	1.79558	3.84x10-18	C3
ENSG00000101349	-1.401	0.000144	C3
ENSG00000101438	-2.15335	3.04x10-05	C3
ENSG00000101812	-1.34195	0.009156	C3
ENSG00000101825	1.10264	2.67x10-10	C3
ENSG00000101951	-1.8235	0.003528	C3
ENSG00000102271	1.34268	2.07x10-12	C3
ENSG00000102359	1.46207	1.75x10-20	C3
ENSG00000102385	1.30376	2.02x10-15	C3
ENSG00000102452	1.29402	4.38x10-09	C3
ENSG00000102837	-2.33145	9.88x10-06	C3
ENSG00000103196	2.31169	1.81x10-37	C3
ENSG00000103241	1.82511	1.26x10-34	C3
ENSG00000103449	-1.76452	2.82x10-06	C3
ENSG00000103460	-1.60658	0.000549	C3
ENSG00000104415	1.68077	2.11x10-18	C3
ENSG00000104722	1.20366	0.000252	C3
ENSG00000105352	1.28229	1.65x10-07	C3
ENSG00000105419	1.94209	3.57x10-28	C3
ENSG00000105509	2.87053	3.81x10-22	C3
ENSG00000105605	-1.51396	0.004284	C3
ENSG00000105609	1.03728	3.22x10-07	C3
ENSG00000105664	1.56988	4.61x10-06	C3
ENSG00000105877	-1.16358	4.71x10-07	C3
ENSG00000106366	2.51262	1.39x10-29	C3
ENSG00000106624	2.04463	1.28x10-30	C3
ENSG00000106631	1.18579	0.008555	C3
ENSG00000106809	1.37667	1.41x10-06	C3
ENSG00000106819	2.59238	7.89x10-22	C3
ENSG00000107105	1.09296	0.000371	C3
ENSG00000107562	1.76143	9.29x10-16	C3
ENSG00000107957	1.15201	1.59x10-21	C3
ENSG00000108242	-1.70872	0.000436	C3
ENSG00000108381	2.06584	3.81x10-22	C3
ENSG00000108823	1.94079	1.16x10-17	C3
ENSG00000109047	1.15826	1.10x10-06	C3
ENSG00000109205	1.45357	0.005945	C3
ENSG00000109832	-1.26505	1.62x10-05	C3
ENSG00000110680	-1.15771	0.011084	C3
ENSG00000110900	1.43032	1.71x10-11	C3
ENSG00000111834	-1.41192	1.92x10-08	C3
ENSG00000112164	-1.33991	0.000254	C3
ENSG00000112769	1.1541	1.28x10-14	C3
ENSG00000112964	1.10468	3.33x10-08	C3
ENSG00000113196	1.66607	1.18x10-06	C3
ENSG00000113319	1.29932	2.81x10-18	C3
ENSG00000113327	-1.53895	0.044119	C3
ENSG00000113749	1.28972	7.53x10-13	C3
ENSG00000114200	1.22561	0.000563	C3
ENSG00000114248	-1.07408	0.002239	C3
ENSG00000115386	-1.71484	0.000117	C3
ENSG00000115592	-1.07258	0.002234	C3
ENSG00000115884	1.01165	6.81x10-07	C3
ENSG00000116132	2.07659	6.27x10-18	C3
ENSG00000116741	1.20025	4.76x10-10	C3
ENSG00000116774	1.22653	8.77x10-16	C3
ENSG00000116962	1.09129	1.29x10-12	C3
ENSG00000117020	1.01307	2.27x10-06	C3
ENSG00000118094	1.01356	9.63x10-06	C3
ENSG00000118231	-1.91683	0.010445	C3
ENSG00000118492	-1.9844	2.57x10-07	C3
ENSG00000118733	-1.02055	0.039399	C3
ENSG00000118985	1.04801	3.86x10-13	C3
ENSG00000119508	2.41177	2.72x10-21	C3
ENSG00000119865	1.31467	1.48x10-20	C3
ENSG00000119973	-2.5183	4.80x10-06	C3
ENSG00000120129	1.05779	4.77x10-07	C3
ENSG00000120149	1.46708	1.64x10-06	C3
ENSG00000121075	-1.0541	0.000681	C3
ENSG00000122121	2.32246	8.54x10-19	C3
ENSG00000122420	2.41677	1.30x10-16	C3
ENSG00000122641	2.29874	4.53x10-20	C3
ENSG00000122786	1.22259	1.31x10-25	C3
ENSG00000122861	1.76968	1.97x10-20	C3
ENSG00000122877	1.41257	1.44x10-12	C3
ENSG00000123342	1.54893	3.81x10-22	C3
ENSG00000123358	1.15439	2.10x10-06	C3
ENSG00000124216	1.03899	5.46x10-10	C3
ENSG00000125872	1.43461	3.78x10-10	C3
ENSG00000125888	-1.11784	0.000142	C3
ENSG00000126353	1.10413	1.90x10-08	C3
ENSG00000126733	-1.2797	0.001914	C3
ENSG00000127083	2.64986	1.88x10-18	C3
ENSG00000127472	1.1019	4.72x10-07	C3
ENSG00000127528	1.82091	8.02x10-32	C3
ENSG00000127954	1.15615	1.64x10-05	C3
ENSG00000128285	2.19869	3.37x10-19	C3
ENSG00000130176	1.79817	2.66x10-16	C3
ENSG00000130368	-1.03117	0.006715	C3
ENSG00000130635	2.28025	1.21x10-28	C3
ENSG00000132031	1.05784	5.49x10-07	C3
ENSG00000132386	1.89787	1.98x10-23	C3
ENSG00000132429	-1.47894	0.000379	C3
ENSG00000132677	-1.26505	3.50x10-06	C3
ENSG00000132854	1.2056	1.70x10-05	C3
ENSG00000132872	1.01464	0.037286	C3
ENSG00000133863	-1.13964	0.00233	C3
ENSG00000134216	-1.96682	0.000739	C3
ENSG00000134240	-2.36378	4.18x10-08	C3
ENSG00000135312	1.09349	2.82x10-05	C3
ENSG00000135902	-1.03264	0.011327	C3
ENSG00000136011	1.3164	3.54x10-10	C3
ENSG00000136110	-1.17355	0.016595	C3
ENSG00000136267	-1.43702	2.16x10-05	C3
ENSG00000136573	1.25324	0.000276	C3
ENSG00000137473	-2.01888	5.03x10-08	C3
ENSG00000137809	2.26838	2.19x10-26	C3
ENSG00000137860	-1.54568	2.61x10-06	C3
ENSG00000138039	-1.64014	2.08x10-06	C3
ENSG00000138271	1.27184	5.49x10-05	C3
ENSG00000138347	-1.15407	0.000613	C3
ENSG00000138615	1.77118	7.78x10-14	C3
ENSG00000138722	1.87733	1.92x10-12	C3
ENSG00000139549	1.25369	2.94x10-08	C3
ENSG00000140682	1.36663	7.96x10-27	C3
ENSG00000141314	-1.008	0.001501	C3
ENSG00000142405	1.12065	3.32x10-10	C3
ENSG00000142609	-1.10001	0.002013	C3
ENSG00000142789	-2.71621	2.86x10-05	C3
ENSG00000143171	-1.38467	0.000364	C3
ENSG00000143195	1.02607	6.07x10-05	C3
ENSG00000143196	2.2619	1.55x10-14	C3
ENSG00000143297	1.09242	0.008146	C3
ENSG00000143867	1.04731	5.83x10-05	C3
ENSG00000144010	-1.38572	0.002531	C3
ENSG00000144810	2.35845	6.06x10-30	C3
ENSG00000144821	-1.009	0.000306	C3
ENSG00000144891	2.33716	3.29x10-24	C3
ENSG00000145192	-1.10355	0.000579	C3
ENSG00000145506	1.202	7.37x10-07	C3
ENSG00000145526	-1.01977	0.046144	C3
ENSG00000145536	1.83324	9.08x10-11	C3
ENSG00000145850	1.13877	0.000134	C3
ENSG00000147223	-1.73315	9.34x10-06	C3
ENSG00000147256	-1.53304	6.97x10-05	C3
ENSG00000147465	-2.06055	6.10x10-09	C3
ENSG00000148516	1.28375	1.06x10-19	C3
ENSG00000148965	-1.01224	0.017648	C3
ENSG00000149534	2.35004	1.26x10-16	C3
ENSG00000149596	1.63491	5.19x10-17	C3
ENSG00000150750	-1.18578	0.008501	C3
ENSG00000151023	-1.43427	5.92x10-08	C3
ENSG00000151067	1.25144	1.02x10-09	C3
ENSG00000151322	-1.01192	6.65x10-10	C3
ENSG00000151360	-1.79428	2.11x10-05	C3
ENSG00000151617	1.52671	2.14x10-16	C3
ENSG00000151892	1.03449	0.002751	C3
ENSG00000151952	-1.14585	0.033432	C3
ENSG00000152049	2.05603	1.01x10-26	C3
ENSG00000152669	-1.48339	7.67x10-09	C3
ENSG00000152936	-1.549	0.000553	C3
ENSG00000153002	1.66965	1.19x10-05	C3
ENSG00000153347	-1.49939	7.48x10-06	C3
ENSG00000153495	1.08808	1.93x10-08	C3
ENSG00000153707	1.20564	8.70x10-06	C3
ENSG00000153789	-1.82413	5.69x10-07	C3
ENSG00000154099	-1.32497	1.88x10-06	C3
ENSG00000154188	1.26872	9.15x10-10	C3
ENSG00000154678	1.58232	1.13x10-11	C3
ENSG00000156269	-3.60331	1.25x10-05	C3
ENSG00000157240	1.21158	2.12x10-19	C3
ENSG00000157613	1.38198	2.77x10-14	C3
ENSG00000157766	1.49686	6.57x10-09	C3
ENSG00000157856	-1.57812	5.75x10-08	C3
ENSG00000158008	1.09527	2.59x10-09	C3
ENSG00000158164	-1.30724	0.000139	C3
ENSG00000158423	-1.00568	2.11x10-08	C3
ENSG00000158816	-1.46824	0.000194	C3
ENSG00000158859	1.3854	2.89x10-14	C3
ENSG00000159307	-1.10503	0.000288	C3
ENSG00000159409	-1.50557	6.64x10-06	C3
ENSG00000159674	1.3346	3.86x10-19	C3
ENSG00000160013	1.51677	3.76x10-25	C3
ENSG00000160161	1.4827	1.26x10-16	C3
ENSG00000160180	-1.27635	0.000378	C3
ENSG00000160472	-1.35373	1.74x10-05	C3
ENSG00000160856	1.36697	3.28x10-08	C3
ENSG00000160862	-1.09521	0.002452	C3
ENSG00000161055	-1.9945	3.55x10-09	C3
ENSG00000161381	1.16842	3.42x10-16	C3
ENSG00000162460	-1.01489	0.005903	C3
ENSG00000162598	-2.02218	1.69x10-07	C3
ENSG00000162630	1.58185	5.38x10-17	C3
ENSG00000162849	1.91219	3.99x10-20	C3
ENSG00000163060	-1.78701	1.54x10-07	C3
ENSG00000163075	-1.52223	4.63x10-11	C3
ENSG00000163145	1.53846	1.08x10-15	C3
ENSG00000163297	1.48181	3.31x10-26	C3
ENSG00000163331	-1.57187	2.89x10-07	C3
ENSG00000163497	1.40971	2.81x10-05	C3
ENSG00000163534	2.24455	2.19x10-11	C3
ENSG00000163710	1.0107	8.38x10-06	C3
ENSG00000163736	1.99438	9.31x10-11	C3
ENSG00000163885	-2.26402	1.12x10-13	C3
ENSG00000164076	-1.78455	5.68x10-06	C3
ENSG00000164185	-1.11536	4.14x10-05	C3
ENSG00000164188	1.89717	4.64x10-20	C3
ENSG00000164326	-1.51471	0.003823	C3
ENSG00000164458	-1.30725	0.032371	C3
ENSG00000164692	1.84323	1.44x10-25	C3
ENSG00000164746	-1.82404	2.62x10-10	C3
ENSG00000164972	-1.94762	2.02x10-09	C3
ENSG00000165124	2.27487	2.47x10-23	C3
ENSG00000165269	1.88432	5.52x10-15	C3
ENSG00000165383	-2.4892	1.50x10-09	C3
ENSG00000165424	1.3045	2.11x10-18	C3
ENSG00000165973	-1.44093	0.001653	C3
ENSG00000166546	1.30761	8.72x10-18	C3
ENSG00000166558	-1.00729	0.018323	C3
ENSG00000166573	1.20828	0.015871	C3
ENSG00000166596	-1.47577	5.19x10-11	C3
ENSG00000166819	2.74271	5.99x10-21	C3
ENSG00000166862	-1.45288	0.009308	C3
ENSG00000167858	-2.25409	4.63x10-11	C3
ENSG00000168461	1.34214	4.19x10-26	C3
ENSG00000168658	-1.41831	2.75x10-07	C3
ENSG00000168702	-1.09894	0.000948	C3
ENSG00000168779	1.49991	2.67x10-07	C3
ENSG00000169184	1.13321	9.90x10-07	C3
ENSG00000169402	-1.30998	4.08x10-07	C3
ENSG00000169594	1.82075	5.36x10-07	C3
ENSG00000169604	1.53948	2.93x10-27	C3
ENSG00000169744	1.12816	2.73x10-21	C3
ENSG00000170044	1.67968	4.74x10-06	C3
ENSG00000170099	-2.93528	3.15x10-10	C3
ENSG00000170262	1.73256	3.51x10-13	C3
ENSG00000170324	-1.56176	0.000116	C3
ENSG00000170367	-1.04302	0.015545	C3
ENSG00000170426	-1.0301	0.001921	C3
ENSG00000170516	-3.33071	0.002297	C3
ENSG00000170627	-1.83418	3.53x10-05	C3
ENSG00000170703	-1.17626	0.000473	C3
ENSG00000170956	1.00012	0.001217	C3
ENSG00000170961	1.45036	1.09x10-09	C3
ENSG00000170962	1.39871	3.91x10-18	C3
ENSG00000170965	-2.51939	7.42x10-11	C3
ENSG00000171199	1.50414	0.036223	C3
ENSG00000171759	-1.12639	0.004716	C3
ENSG00000171772	-1.33531	0.0031	C3
ENSG00000171864	1.07113	0.000588	C3
ENSG00000172156	1.24007	0.000434	C3
ENSG00000172349	1.15744	5.73x10-15	C3
ENSG00000172551	-1.79127	2.96x10-05	C3
ENSG00000172771	-1.42249	1.06x10-10	C3
ENSG00000172935	1.21374	7.93x10-15	C3
ENSG00000173213	-1.10995	0.000942	C3
ENSG00000174145	1.86575	3.79x10-06	C3
ENSG00000174498	-1.48778	0.000267	C3
ENSG00000174576	1.7729	9.55x10-10	C3
ENSG00000174697	2.36995	9.87x10-20	C3
ENSG00000174807	1.42629	7.70x10-15	C3
ENSG00000174876	-1.79305	6.95x10-07	C3
ENSG00000174898	-2.12555	1.11x10-08	C3
ENSG00000174944	1.10391	2.93x10-08	C3
ENSG00000174950	-1.22586	4.77x10-07	C3
ENSG00000176029	-2.55714	1.28x10-14	C3
ENSG00000176170	1.40813	7.60x10-16	C3
ENSG00000176177	1.54652	2.89x10-06	C3
ENSG00000176692	1.82433	1.55x10-13	C3
ENSG00000177182	-1.13177	1.97x10-05	C3
ENSG00000177272	1.03417	1.06x10-05	C3
ENSG00000178033	1.1424	4.72x10-11	C3
ENSG00000178125	-1.54455	1.27x10-08	C3
ENSG00000178473	-1.04617	0.037124	C3
ENSG00000179388	1.50504	1.20x10-10	C3
ENSG00000179902	-1.93645	1.18x10-09	C3
ENSG00000179930	-1.29057	2.29x10-05	C3
ENSG00000180139	2.35557	1.26x10-34	C3
ENSG00000180318	-1.43717	0.00335	C3
ENSG00000181104	1.0312	5.24x10-12	C3
ENSG00000181541	2.92034	1.43x10-19	C3
ENSG00000182162	1.11306	8.92x10-12	C3
ENSG00000182329	-1.25075	3.73x10-06	C3
ENSG00000182632	-1.02887	0.005858	C3
ENSG00000182752	1.86141	1.02x10-16	C3
ENSG00000183273	-2.51086	3.78x10-10	C3
ENSG00000183346	-1.04034	0.000698	C3
ENSG00000184809	-1.7113	1.90x10-07	C3
ENSG00000184845	1.90302	2.97x10-06	C3
ENSG00000185681	-1.86587	3.89x10-09	C3
ENSG00000185860	-1.7987	5.83x10-05	C3
ENSG00000186340	2.43518	1.18x10-27	C3
ENSG00000186466	1.0612	0.006391	C3
ENSG00000186471	-1.40677	0.000136	C3
ENSG00000186675	-1.02104	0.007583	C3
ENSG00000186897	-1.16981	0.000756	C3
ENSG00000187135	-1.76443	0.000804	C3
ENSG00000187288	3.0868	1.98x10-23	C3
ENSG00000187479	1.71978	4.85x10-19	C3
ENSG00000187492	-3.70387	1.39x10-22	C3
ENSG00000187616	1.23109	0.002109	C3
ENSG00000187821	-1.69609	0.003755	C3
ENSG00000188257	2.94605	4.96x10-16	C3
ENSG00000188505	1.20284	0.000201	C3
ENSG00000189129	1.10791	2.38x10-10	C3
ENSG00000189186	-2.46043	6.65x10-08	C3
ENSG00000189292	-1.17149	0.000303	C3
ENSG00000196092	1.16978	7.70x10-05	C3
ENSG00000196188	1.00704	0.003756	C3
ENSG00000196289	-1.12843	0.000406	C3
ENSG00000196562	1.01766	6.41x10-08	C3
ENSG00000196616	3.36223	2.12x10-19	C3
ENSG00000197253	1.31046	0.000364	C3
ENSG00000197616	-2.31484	6.29x10-08	C3
ENSG00000197745	-2.43898	1.48x10-06	C3
ENSG00000197766	1.6571	2.43x10-19	C3
ENSG00000197826	-1.68657	1.04x10-05	C3
ENSG00000197934	-1.43187	0.000385	C3
ENSG00000198400	1.16813	2.54x10-06	C3
ENSG00000198523	2.7113	1.33x10-26	C3
ENSG00000198597	-1.16434	0.001777	C3
ENSG00000198681	-2.40917	0.000675	C3
ENSG00000198682	1.03848	2.64x10-13	C3
ENSG00000198739	-1.89161	2.19x10-05	C3
ENSG00000198753	1.35389	3.77x10-07	C3
ENSG00000198796	2.27064	9.23x10-19	C3
ENSG00000198842	-1.02869	0.003301	C3
ENSG00000198883	-1.2114	0.00019	C3
ENSG00000203663	-1.0608	0.007431	C3
ENSG00000203740	1.52687	4.50x10-06	C3
ENSG00000203808	-1.12796	0.001655	C3
ENSG00000204121	-1.85577	2.59x10-05	C3
ENSG00000204790	-1.55973	0.000362	C3
ENSG00000205143	-1.66043	9.87x10-09	C3
ENSG00000205414	1.8054	1.12x10-17	C3
ENSG00000205632	2.18559	5.32x10-06	C3
ENSG00000206052	1.03567	2.36x10-07	C3
ENSG00000206538	1.9492	1.82x10-19	C3
ENSG00000211611	1.51979	0.00233	C3
ENSG00000211625	3.08763	1.13x10-13	C3
ENSG00000211644	1.79854	1.56x10-07	C3
ENSG00000211649	2.0578	1.89x10-06	C3
ENSG00000211651	1.79882	2.86x10-05	C3
ENSG00000211662	1.56003	0.000824	C3
ENSG00000211663	1.09058	0.027902	C3
ENSG00000211664	1.86982	5.87x10-05	C3
ENSG00000211667	1.17876	0.024858	C3
ENSG00000211745	1.05632	0.000852	C3
ENSG00000211790	1.02276	0.000268	C3
ENSG00000211892	1.49829	0.000459	C3
ENSG00000211893	1.73272	7.98x10-06	C3
ENSG00000211933	1.4763	0.002828	C3
ENSG00000211942	1.78271	0.000305	C3
ENSG00000211943	1.34348	0.004605	C3
ENSG00000211950	1.78172	0.000218	C3
ENSG00000211959	1.61301	0.000234	C3
ENSG00000211961	2.03354	2.91x10-06	C3
ENSG00000211974	1.1915	0.042963	C3
ENSG00000213401	-1.66444	0.037056	C3
ENSG00000214128	-1.06971	0.001815	C3
ENSG00000214381	-1.37675	0.003234	C3
ENSG00000215148	-1.27821	0.005011	C3
ENSG00000215187	-1.60065	1.10x10-08	C3
ENSG00000215218	1.65706	1.74x10-11	C3
ENSG00000215246	1.3091	5.20x10-12	C3
ENSG00000221818	1.79314	2.85x10-11	C3
ENSG00000221972	1.35658	3.69x10-12	C3
ENSG00000222022	1.93137	2.83x10-09	C3
ENSG00000222032	1.91117	1.76x10-09	C3
ENSG00000222037	1.05414	0.019226	C3
ENSG00000223786	-1.40894	0.002365	C3
ENSG00000224041	1.17072	0.005131	C3
ENSG00000224116	1.30803	2.00x10-08	C3
ENSG00000224373	1.414	0.002365	C3
ENSG00000225255	-2.42512	5.07x10-07	C3
ENSG00000225398	1.03869	0.000511	C3
ENSG00000225698	2.62336	3.38x10-12	C3
ENSG00000225706	1.50791	3.30x10-08	C3
ENSG00000225826	1.36343	0.000117	C3
ENSG00000225948	-1.54068	1.66x10-05	C3
ENSG00000226191	-1.36093	0.000261	C3
ENSG00000226777	1.15678	0.001505	C3
ENSG00000226956	-1.09135	0.024581	C3
ENSG00000226965	-1.00017	0.034274	C3
ENSG00000227220	1.24046	1.40x10-09	C3
ENSG00000227467	1.10359	3.30x10-07	C3
ENSG00000227932	-1.73132	0.044713	C3
ENSG00000227954	-1.42915	9.88x10-11	C3
ENSG00000227964	2.53428	6.31x10-17	C3
ENSG00000228651	1.03182	1.80x10-05	C3
ENSG00000229116	1.04301	0.00019	C3
ENSG00000230018	1.05157	5.56x10-07	C3
ENSG00000230246	-2.19434	8.53x10-06	C3
ENSG00000230525	-1.38748	0.000332	C3
ENSG00000230630	1.08618	1.87x10-06	C3
ENSG00000230970	-1.30103	0.000725	C3
ENSG00000231027	1.14192	2.36x10-06	C3
ENSG00000231123	1.96235	8.98x10-11	C3
ENSG00000231533	-1.53268	7.52x10-07	C3
ENSG00000231621	-1.50047	4.58x10-06	C3
ENSG00000232072	-2.1598	1.48x10-05	C3
ENSG00000232111	-1.73004	0.023363	C3
ENSG00000232153	-1.39767	0.002841	C3
ENSG00000232192	1.91232	1.05x10-15	C3
ENSG00000232721	-1.07921	0.001873	C3
ENSG00000232903	-1.8284	0.000944	C3
ENSG00000233293	-1.27068	3.69x10-05	C3
ENSG00000233515	-1.96084	0.008099	C3
ENSG00000233521	2.25758	1.38x10-20	C3
ENSG00000233639	-2.33475	0.015839	C3
ENSG00000233999	1.21915	0.005802	C3
ENSG00000234199	1.04124	0.003866	C3
ENSG00000234493	-1.71298	9.63x10-06	C3
ENSG00000234521	-1.13407	0.000319	C3
ENSG00000234602	-1.58557	8.27x10-09	C3
ENSG00000234965	-1.6491	4.94x10-09	C3
ENSG00000235770	1.0271	8.83x10-10	C3
ENSG00000235830	-1.11487	7.36x10-06	C3
ENSG00000236107	-1.03647	0.03474	C3
ENSG00000236366	-1.32791	0.00756	C3
ENSG00000236449	-1.98071	7.74x10-07	C3
ENSG00000236502	-2.40464	3.98x10-05	C3
ENSG00000236941	-1.43167	0.004009	C3
ENSG00000236975	-1.24595	9.24x10-05	C3
ENSG00000237087	-1.93286	5.03x10-05	C3
ENSG00000237223	-1.22773	0.000191	C3
ENSG00000237254	1.00829	0.004297	C3
ENSG00000239961	1.73276	1.75x10-11	C3
ENSG00000240350	1.16119	8.24x10-07	C3
ENSG00000240671	1.25275	0.018067	C3
ENSG00000240990	1.02414	0.013829	C3
ENSG00000242076	1.36781	0.004604	C3
ENSG00000242580	1.38965	0.0065	C3
ENSG00000243710	-1.28825	2.88x10-07	C3
ENSG00000243955	-1.47702	2.87x10-05	C3
ENSG00000244953	2.00563	7.43x10-14	C3
ENSG00000245164	1.41917	2.42x10-10	C3
ENSG00000246394	-1.51726	7.49x10-07	C3
ENSG00000246430	1.61408	8.25x10-13	C3
ENSG00000248265	-1.1152	3.65x10-06	C3
ENSG00000248713	-1.10026	0.000923	C3
ENSG00000248890	1.03135	7.67x10-09	C3
ENSG00000249082	-1.4463	0.001866	C3
ENSG00000249092	-1.34269	2.64x10-07	C3
ENSG00000249610	-1.46455	0.000248	C3
ENSG00000249669	1.50758	1.16x10-17	C3
ENSG00000249743	-1.88981	0.000683	C3
ENSG00000249803	-3.25423	9.17x10-05	C3
ENSG00000249816	-1.02211	0.007992	C3
ENSG00000250280	1.15769	1.25x10-05	C3
ENSG00000250284	-2.0561	0.01399	C3
ENSG00000250413	-1.40467	4.45x10-08	C3
ENSG00000251443	-1.58037	0.005763	C3
ENSG00000253123	1.01604	3.81x10-05	C3
ENSG00000253159	1.71685	3.99x10-20	C3
ENSG00000253161	1.64439	1.12x10-13	C3
ENSG00000253181	-1.34222	0.001963	C3
ENSG00000253274	1.43496	0.004118	C3
ENSG00000253369	-2.01696	4.01x10-06	C3
ENSG00000253400	-1.12381	0.010617	C3
ENSG00000253497	1.4425	0.000812	C3
ENSG00000254056	1.5352	0.003319	C3
ENSG00000254404	-1.58347	8.61x10-06	C3
ENSG00000254414	1.03061	7.67x10-09	C3
ENSG00000254510	1.23475	2.42x10-05	C3
ENSG00000254933	1.38411	0.00016	C3
ENSG00000255118	-1.04244	0.000204	C3
ENSG00000255136	-1.3084	0.005566	C3
ENSG00000255399	2.26871	1.43x10-11	C3
ENSG00000257951	-1.09549	0.000356	C3
ENSG00000258592	-1.05322	0.004585	C3
ENSG00000258609	-1.49489	0.000491	C3
ENSG00000259134	1.23575	6.60x10-09	C3
ENSG00000259159	1.00398	4.44x10-11	C3
ENSG00000259261	1.28592	0.010949	C3
ENSG00000259306	-1.03083	0.008825	C3
ENSG00000259508	-2.2567	4.30x10-10	C3
ENSG00000259672	-2.73504	4.16x10-05	C3
ENSG00000260244	1.2064	2.31x10-10	C3
ENSG00000260265	-1.10396	8.65x10-05	C3
ENSG00000260857	-1.23124	0.007764	C3
ENSG00000261039	1.98991	4.69x10-09	C3
ENSG00000261122	-2.01634	1.87x10-05	C3
ENSG00000261222	1.17887	8.78x10-07	C3
ENSG00000261295	1.36947	1.41x10-13	C3
ENSG00000261399	-1.35305	4.11x10-06	C3
ENSG00000261409	-1.29471	0.002455	C3
ENSG00000261667	-2.52534	0.003309	C3
ENSG00000261706	1.49943	0.001379	C3
ENSG00000261742	1.98543	2.28x10-09	C3
ENSG00000261761	-2.10581	0.026957	C3
ENSG00000262117	-1.65764	0.000677	C3
ENSG00000262267	-2.02366	0.007716	C3
ENSG00000263082	-1.05416	0.00024	C3
ENSG00000263812	-1.13364	0.000307	C3
ENSG00000263834	1.42341	2.20x10-08	C3
ENSG00000263914	-1.16563	0.002032	C3
ENSG00000264230	1.10437	0.00014	C3
ENSG00000265683	-1.10076	1.91x10-08	C3
ENSG00000266524	-1.15434	0.005553	C3
ENSG00000266560	-1.23688	0.005748	C3
ENSG00000266835	1.24252	2.87x10-11	C3
ENSG00000266995	1.68085	7.39x10-08	C3
ENSG00000267013	2.00869	1.89x10-07	C3
ENSG00000267409	1.31417	9.20x10-05	C3
ENSG00000267413	-1.0439	0.036692	C3
ENSG00000267472	-1.02566	0.005845	C3
ENSG00000267583	1.41027	2.90x10-10	C3
ENSG00000268902	-1.36857	0.004485	C3
ENSG00000268916	-1.92021	1.20x10-06	C3
ENSG00000268940	-3.2814	9.48x10-07	C3
ENSG00000269058	-1.29439	3.52x10-05	C3
ENSG00000269096	-1.49877	0.016332	C3
ENSG00000269138	-1.39085	0.000381	C3
ENSG00000269364	-1.55586	1.09x10-06	C3
ENSG00000270412	1.44255	3.72x10-12	C3
ENSG00000270547	1.30576	8.97x10-08	C3
ENSG00000270765	-1.85232	1.36x10-08	C3
ENSG00000270947	-1.18774	0.000433	C3
ENSG00000271178	1.05744	0.041341	C3
ENSG00000271811	1.60442	7.45x10-08	C3
ENSG00000271937	-1.22739	1.03x10-08	C3
ENSG00000273388	1.45464	5.13x10-05	C3
ENSG00000276397	-2.24514	0.007452	C3
ENSG00000276566	2.72773	2.93x10-10	C3
ENSG00000277235	-1.32167	2.97x10-08	C3
ENSG00000277586	1.86353	1.53x10-08	C3
ENSG00000277863	-1.04125	0.007023	C3
ENSG00000277954	1.32124	2.13x10-10	C3
ENSG00000278196	1.94193	1.92x10-05	C3
ENSG00000278621	1.77981	2.57x10-12	C3
ENSG00000278893	1.5708	2.09x10-12	C3
ENSG00000279014	-1.05018	0.024503	C3
ENSG00000279526	1.14048	3.96x10-07	C3
ENSG00000279965	-1.36664	5.95x10-06	C3
ENSG00000280143	1.647	1.24x10-19	C3
ENSG00000280145	-1.63904	0.000147	C3
ENSG00000280225	-1.42975	0.005317	C3
ENSG00000280439	-2.04373	1.72x10-08	C3
ENSG00000280604	1.28513	7.47x10-05	C3
ENSG00000280614	1.21299	0.00019	C3
